# Supplementary material
Source: HighWire-hosted journal article supplement (https://jnnp.bmj.com/content/92/6/629)
Supplement: inline-supplementary-material-1 [file inline-supplementary-material-1.xlsx]

## Sheet: Table 1 - Review Table
Appendix Table. Review of Mortality Predictors and Cause of Death among Parkinson's and Related Disorders
Author	Year	Population	Study Design & Data Source	Baseline age/age at onset	Outcome	Predictors of Mortality	Causes of Death	Funding Source
Armstrong et al.	2018	N=658 caregivers, family, and friends of patients with DLB	Prospective cohort study using suveys	<50 yrs (17%), 50-59 yrs (30%), 60-69 yrs (28%), 70-79 yrs (19%), >80 yrs (7%)	Time, place and cause of death	76% of cohort died within 5 yrs of diagnosis, 12% within 1 yr. Medain time from symptom onset to death was 5 to 6 yrs. 80% used hospice; 25% felt hospice referral was delayed. 43%died in skilled nuring facility, 36% at home, 9% in hospice facility, 8% in hospital.	63% failure to thrive, aspiration/pneumonia 23%, other medical condition 20%, falls/related complication 9%.	Univ of FL, Kassar Fund for DLB
Auyeung et al.	2012	N=171 new onset PD patients recruited from 1995-2002 and followed until 2011 in a hospital-based movement disorder clinic in Hong Kong, China	Prospective cohort study using combination of survey, medical record, and death certificate data	Mean age (SD) at onset: 62.2 (10.6) years	Predictors of mortality (HR and 95% CIs reported)	Increased risk of death from dementia vs. absence (HR (95% CI) (5 (2.1, 3.7)), PIPon vs. absence (2.8 (1.2, 6.8)), older onset per year of aging (1.05 (1.01, 1.10)), and PIGD (2.1 (1.2, 3.7))	-	Unfunded
Beyer et al.	2001	N=245 PD patients in Norway from regional clinics and hospitals, diagnosed in 1993 and followed until 1996; control deaths from general population	Prospective cohort study using combination of survey, medical record, and death certificate data	Baseline mean age (SD) for those who died during follow-up: 78.7 (6.5) years	Cause of death (Percentages reported)	Deceased PD patients at baseline were older (mean (SD) 78.7 (6.5) vs. 70.9 (8.1) years), had higher UPDRS score (mean (SD) 65 (24.4) vs. 41.5 (23.4)) and H&Y staging (mean (SD) 3.5 (1) vs. 2.5 (0.9)) vs. those who did not die	PD patients twice as likely to die from pneumonia (20% PD vs. 9% in controls); less likely to die from cancer (17% PD vs. 25% in controls); 56% of death certificates had PD registered as contributing cause of death	Unfunded
Chiu et al.	2010	N=197 patients with PSP in the Netherlands followed up until 2008	Prospective cohort study using combination of survey and medical record data	Mean age at symptom onset (SD): 66 (8) for PSP	Predictors of mortality (HR and 95% CIs reported)	Increased risk of death in PSP patients: male sex (HR (95% CI) (1.6 (1.1, 2.3)), older onset age (>72 vs. <62) (2.03 (1.21, 3.4)), PSP rating scale vs. 0-35, 35-48 (1.96 (1.07, 3.58), 48-62 (2.99 (1.64, 5.44), >62 (8.55) (4.48, 16.33))	-	Prinses Beatrix Fonds
de Lau et al.	2014	N=414 PD patients in regional and academic hospitals in The Netherlands followed from 2003 to 2010	Prospective cohort study using combination of survey and medical record data	Baseline mean age (SD): 61.1 (11.4) years	Predictors of mortality (HR and 95% CIs reported)	Baseline predictors of mortality: higher age per year of aging (HR (95% CI): 1.1 (1, 3.6)), male vs. female sex (1.9 (1, 3.6)), cognitive impairment vs. absence (3.0 (1.6, 5.7)), per point increase in PIGD (1.3 (1.1, 1.5)), psychotic symptoms vs. absence (2.6 (1.1, 5.9))	-	Dutch Parkinson's Disease Society (JJvH)
dell'Aquila et al.	2013	N=43 patients with PSP, N=43 with RS or PSP-P in Bari, Italy and followed from 1998-2008	Prospective cohort study using combination of survey and medical record data	Mean age at onset (SD): 63 (7) for PSP; 63 (7) for RS; 60 (8) for PSP-P	Predictors of mortality (HR and 95% CIs reported)	Increased risk of death in all patients (HR (95% CI)): onset age (>64 vs. <64) (2.8 (1.3, 5.7)), early signs of dysphagia (2.3 (1, 5.3), Cognitive deficits (impairment in more than one area of cognition with consequent permanent disability in performing activities of daily living) (3.6, (1.6, 8.2))	-	Unfunded
Desesquelles et al.	2014	N=4,137 deaths in Italy, and N=4,484 deaths in France with PD as underlying cause of death from 2008	Cross-sectional study of death certificate data	Not reported	Cause of death (SMR per 1,000,000 reported)	-	SMR rates per 1,000,000 for contributing causes of death with PD as underlying cause of death: other diseases of the circulatory system (63), dementias (excluding Alzheimer's) (49), senility (39), pneumonia (34) in Italy; dementias (excluding Alzheimer's) (49), pneumonia (39), other heart diseases (38), lung diseases due to external agents (37)	Unfunded
Diem-Zangerl et al.	2009	N=238 PD patients with onset between 1974 and 1984 at a movement disorder clinic in Austria followed until 2004 or death	Retrospective study of medical record and death certificate data	Mean age at onset (range): 62.4 (61, 64) years; age at death: 77.2 (76,78) years; age at last follow-up among survivors: 79 (76, 82) years	Predictors of mortality (HR and 95% CIs reported) and cause of death (% reported)	Baseline predictors of mortality: age at onset per year of aging (HR (95% CI): 1.09 (1.07, 1.11)), male sex vs. female (1.82 (1.36, 2.44)), gait disorder vs. absence (1.48 (1.01, 2.18))	Major causes of death: cardiovascular (30.2%), Parkinson's disease (23.3%), cerebrovascular disease (14.3%), neoplasms (12.2%), gastrointestinal (6.3%), pneumonia (7.3%), COPD (3.2%), accident (2.1%), other (4.8%)	Not reported
Duarte et al.	2013	N=273 PD patients in Spain recruited between 1978 and 1998 and followed until December 1998 or death	Prospective cohort study using combination of medical record and death certificate data	Mean age at onset (SD) for those who died during follow-up: 65.4 (10.4) years; age at death: 79.0 (7.9) years; age at onset for all patients: 75.6 (8.6) years	Predictors of mortality (HR and 95% CIs reported) and cause of death (% reported)	Baseline predictors of mortality: age at onset per year of aging (HR (95% CI): 1.05 (1.01, 1.09)), clinical akinesia + rigidity vs. absence (2.2 (1.06, 4.88))	Major causes of death: cardiovascular (42%), respiratory disease (26%), cerebrovascular disease (13%), neoplasms (9%), accident or other (10%)	Not reported
Elbaz et al.	2003	N=196 PD patients with onset of PD from 1976-1995 and 185 control subjects without PD; both cohorts from Olmsted County, Minnesota	Case-control study of medical record data	Mean age at onset (range): 72 (41-97) years	Predictors of mortality (RR and 95% CIs reported)	Decreasing trend in RR (95% CI) of death from age at onset of PD: < 67, RR: 2.04 (0.99, 4.19); 67-76, RR: 1.76 (1.08, 2.86); >76, RR: 1.48 (0.95, 2.29). PD patients with rest tremor vs. age-matched controls, RR: 1.52 (1.09, 2.11)	-	National Institutes of Health (NS33978) and Rochester Epidemiology Project (AR30582)
Fall et al.	2003	N=170 previously studied patients diagnosed with PD in 1989 at regional neurology clinic in Sweden re-evaluated after 9.4 years; and N=510 controls without PD	Case-control study of medical record data	Baseline mean age (95% CI): 73.7 (NR) years; age at death for cases: 82 (80,83) years; age at death for controls: 83 (82, 84) years	Cause of death (HR and 95% CIs reported)	-	Causes of death vs. controls: Other respiratory disease (mostly pneumonia), HR (95% CI): 7.5 (4.1, 14); Other diseases, HR: 3.5 (2.4, 5.2)	County Council of Ostergotland
Fernandes et al.	2015	N=206 patients with PD in a tertiary movement clinic in Brazil from 2006-2012	Prospective cohort study using combination of survey and medical record data	Mean age (SD) at onset for those who died during follow-up: 64 (1.5) years; age at onset for all patients: 58 (11.5) years; age at onset for surviving patients at last follow-up: 56 (0.89) years	Predictors of mortality (HR and 95% CIs reported) and cause of death (% reported)	Baseline predictors of mortality: age at onset per year of aging (HR (95% CI): 1.06 (1.02, 1.10)); Race (non-white vs. white) (HR: 3.41 (1.21, 9.58)); any risk factor (HR: 0.37 (0.16, 0.84))	Of N=43 who died, causes were pneumonia (28%), CVD (19%), cancer (14%), other infections (12%), COPD (9%), Parkinson (7%), other causes (11%)	Institutional Research Funds linked to The Hospital de Clinicas de Porto Alegre (FIPE-HCPA)
Fernandez et al.	2002	15,237 PD nursing home residents >65 yoa in 5 U.S. States from 1992-1996	Retrospective cohort study using the Systematic Assessment in Geriatric drug use via Epidemiology database	Baseline age (%); 65-74 years (16.6%); 75-84 years (48.95%); 85+ years (34.46%)	Predictors of mortality (RR and 95% CIs reported)	Baseline predictors of mortality: advanced age (>85) (RR (95% CI): 2.22 (1.99, 2.47), male gender (RR: 1.73 (1.60, 1.87)), severe functional (RR: 1.81 (1.53, 2.13) and congitive impairement (RR: 1.54 (1.38, 1.72), vision problems (RR: 1.25 (1.20, 1.57)), pressure ulcers (RR: 1.25 (1.14, 1.37)), CHF (RR: 1.49 (1.35, 1.65)), diabetes mellitus (RR: 1.22 (1.11, 1.35)), pneumonia (RR: 1.39 (1.09, 1.77…	-	National Institute on Aging (AG11624) and United States Department of Health and Human Project (500-89-0046)
Forsaa et al.	2010	N=230 patients with PD in southwestern Norway followed from 1993-2005	Prospective cohort study using combination of survey and death certificate data	Mean age (SD) at onset: 64.9 (9.9) years; age at baseline: 73.5 (8.5) years	Predictors of mortality (HR and p-values reported)	Baseline predictors of mortality: age at onset (HR (p-value)): 1.40 for 10 year increase (p=0.023)), chronological age (HR: 1.51 for 10 year increase (p=0.043)), male sex (HR: 1.63 (p=0.003)), UPDRS motor score (HR: 1.18 for 10-point increase (p<0.001)), dementia (HR: 1.89 (p=0.001)), psychotic symptoms (HR: 1.45 (p=0.039))	-	In part by Western Norway Regional Health Authority
Garcia-Ptacek et al.	2014	N=15,209 patients with dementia (LBD (N=461), PDD (N=283), FTD (N=348), and other including corticobasal degeneration (N=353)) in the Swedish Dementia Registry diagnosed between 2008-2011	Retrospective cohort study using registry database	Mean age (SD) at diagnosis: 77 (7) for LBD, 75 (7) for PDD, 69 (9) for FTD, 73 (10) other	Predictors of mortality (HR and 95% CIs reported)	Baseline predictors of mortality (HR (95% CI): male sex (1.56 (1.46, 1.66)), age ≥ 85 vs. < 65 (6.17 (4.97, 7.65)), MMSE 20-24 vs. ≥ 25 (1.45 (1.32, 1.58)), MMSE 10-19 vs. ≥ 25 (2.14 (1.96, 2.34)), MMSE 0-9 vs. ≥ 25 (2.91 (2.47, 3.44)), Institution vs. home death (1.42 (1.27, 1.57)), 2-5 medications vs. 0-1 (1.25 (1.12, 1.39)), 6-9 medications vs. 0-1 (1.53 (1.37, 1.71)), ≥ 10 medications vs. 0-1…	We hould make clear whether these results are mixed across whole sample (e.g. including FTD) or only PDRD	Swedish Brain Power Network; the Swedish association of local authorities and regions; the Stockholm County Council and Alzheimerfonden
Goy et al.	2015	Northwestern US VA Medical Center patients with PD or Parkinsonism and treated with dopaminergic prescriptions for at least 3 years. N=339 patients who died	Retrospective within subjects repeated measures design using VA medical record data	Mean age (SD) as first noted in chart: 73.7 (6.8) years; age at death: 80 (6.6) years	Predictors of hospice eligibility that were significantly different in 6-12 mo period prior to death vs. 18-24 mo and 30-36 mo periods (mean differences and p-values reported)	Normal weight patients at 30-36 mo had accelerated weight loss 6-12 mo before death (p=0.003) in constrast to overweight patients who did not have accelerated weight loss during same time period; BMI < 18, alone or combined with a shift in prescribing/decrease to 2 or less dopaminergic agent prescriptions	-	In part by Health Services Research and Development (HSR&D) Career Development Award for Dr. Goy and the HSR&D Portland Center for the Study of Chronic, Comorbid Mental and Physical Disorders at the Portland VA Center
Goy et al.	2007	N = 47 family caregivers of patients with PD evaluated at the Oregon Health and Science University and Portland VA Medical Center who died from 6-53 months before the interview.	Caregiver ratings of symptoms in patients with PD in final months of life (qualitative)	Mean age at death: 78 years	Caregiver ratings of symptoms in final month of life	Caregiver rated symptom "quite a bit" or "very much" bothersome: difficulty eating (48.9%), difficulty communicating (68.1%), physical discomfort (40.4%), insomnia (34.1%), shortness of breath (31.9%), choking (38.3%), confusion (46.8%), depressed mood (36.1%), anxiety (38.3%)	-	VA HSR&D Career Development Award; Medical Research Foundation of Oregon; Parkinson's Disease Research, Education and Clinical Center
Gray et al.	2009	N=109 PD patients in a community setting in the UK with baseline measures from January 2000 to follow-up measures end of 2006	Retrospective study using combination of survey and medical record data	Mean age (SD) at baseline for those who were alive during follow-up: 72.7 (7.7) years; age at baseline for patients who died by follow-up: 77.5 (7.5) years; age at death: 80.8 (7.4) years	Predictors of mortality from baseline assessment tests (Hazard Ratio and 95% CIs reported)	Baseline assessment predictors of mortality: One unit increase in Tinetti gait score (HR (95% CI): 1.30 (1.1, 1.5)), one year increase in baseline age year 2000 (HR: 1.06 (1.02, 1.11)), male sex vs. female (HR: 2.9 (1.5, 5.4))	-	British Geriatric Society; Northumbria Healthcare NHS Foundation Trust; Parkinson's Disease Society
Hely et al.	1999	N=149 patients recruited for a double blind randomized study of low dose levodopa-carbidopa vs low dose bromocriptine in Australia between 1984-1987 and followed up for 13 years	Retrospective study of the trial data using combination of survey and medical record data	Mean age at death (SD): 74.5 (8.2) years	Predictors of mortality (OR and 95% CIs reported) and cause of death (% reported)	Baseline predictors of mortality: early use of bromocriptine (OR (95% CI): 2.99 (1.21, 7.36)), age at onset per 10 years (OR: 3.10 (1.78, 5.42)), pre-study progression rate (OR: 2.8 (1.15, 6.79))	Pneumonia (30%), cardiovascular (21%), carcinoma (19%), stroke (16%), Parkinson's (5%)	Novartis and Hennessey Bequest
Higginson et al.	2012	N=82 patients with late stage IPD, MSA, PSP stages 3-5 on H&Y in southeast England	Prospective study with measures at baseline and on three occasions over 1 year using survey data	Baseline mean age (SD): IPD: 67 (8) years; PSP: 69 (11) years; MSA: 67 (8) years	Predictors of severe symptoms near end of life using disease-specific quality of life instruments	Death at end of follow-up: 6% among IPD patients, 47% among PSP and MSA patients. Men composed 54% of IPD patients, 47% of PSP patients, and 65% of MSA patients. Baseline mean (range) POS scores were 13.7 (14.5, 5.7) for IPD patients, 11.9 (10.0, 6.1) for PSP patients, and 14.3 (16.0, 4.5) for MSA patients	-	UK Department of Health Research Initiative for Long Term Neurological Conditions (05/Q0703/196)
Huang et al.	2015	N=1423 adults with newly diagnosed PD from 2000 - 2003 and followed until 2008 in a Taiwan	Retrospective cohort study with nested cohort of patients using a national health insurance database in Taiwan	Baseline age (%); 40-49 years (5.1%); 50-59 years (10.5%); 60-69 years (28.3%); 70-79 years (44.4%); 80 + years (11.7%)	Nested cohort of outcomes post-fracture including in-hospital mortality (OR and 95% CIs reported)	Pre-fracture in PD was associated with post-fracture mortality from falls after upper limb fracture (OR (95% CI): 1.74 (1.4, 2.2), lower limb fracture (OR: 1.21 (1.1, 1.33)), hip fracture (OR: 1.13 (1.03, 1.24))	-	Taiwan Ministry of Science and Technology (NSC102-2314-B-038-021-MY3)
Hughes et al.	2004	N=90 PD patients and 50 controls recruited from a neurologic clinic in the UK between 1985 and 1986 with mortality ascertained at 11 years follow-up	Case-control study using survey, medical record, and national statistics data	Mean age at baseline (SD) 64.2 (10) years	Predictors of mortality from baseline assessment tests (HR and 95% CIs reported)	Baseline predictors of mortality: one unit increase in baseline age (HR (95% CI): 1.09 (1.05, 1.13)), dementia vs. absence (HR: 1.94 (1.26, 2.99)), depression vs. absence (HR: 2.66 (1.59, 4.44))	-	Parkinson's Disease Society; the Mental Health Foundation; Special Trustees of the United Leeds Hospitals
Jones et al.	2012	N=9634 PD deaths, N=221,945 non-PD control deaths in 5 Provincial administrative databases in Canada for individuals over 65 years of age from 1991-2001	Retrospective cohort study using administrative data	Incidence per 100,000 person-years of PD by age (95% CI): 65-69 years: 59.2 (55, 63); 70-74 years: 166 (159, 174); 75-79 years: 287 (276, 298); 80-84 years: 462 (444, 479); 85-100 years: 722 (697, 748)	Incidence and mortality risk of PD (frequency (%) reported)	-	Nervous system disorders (28.5% vs. 3.3%) and respiratory disease (13.9% vs. 8.2%) higher than controls, cancer lower than controls (12.2% vs. 20.9%). 43% greater risk of all-cause mortality and 51% greater risk of injury mortality from falls compared to controls	Not reported
Kempster et al.	2010	N=129 case records from donors with pathologically proven PD in UK	Cross-sectional medical record review	Mean (SD) age at diagnosis 61.9 (10.7), age at death 75.7 (9.1)	Effect of age on clinico-pathological progression of Parkinson's disease concentrating on final phase near death	Dementia (p<0.005), visual hallucinations (p<0.005) and accumulation of multiple milestones (p<0.005) [milestones include frequent falling, visual hallucinations, cognitive disability, nursing home placement] were associated with high cortical Lewy body scores. Time intervals between disease onset and recording of milestones were strongly influenced by age at onset (p<0.001) and total disease dur…	-	Department of Health's NIHR Biomedical Research Centres; Reta Lila Weston Trust
Lethbridge et al.	2013	N=63,431 death certificates from 1998-2005 in Nova Scotia, with 900 as PD and 1800 age-sex matched controls without PD	Cross-sectional study of death certificates	Mean age at death 82 years	Frequency (%) of co-morbidities and co-occurring causes of death (ratio of observed to expected co-occurrence of cause of death)	-	Co-occurring causes of death (ratio observed/expected): dementia (2.53 (2.21, 2.85)), pneumonia (1.83 (1.58, 2.08))	Canadian Institutes of Health Research (FRN#80067)
Litvan et al.	1996	N=24 with PSP at medical centers in Austria, England, France, and the United States	Retrospective cohort study using research and clinical neuropathological files of seven medical centers	Mean age at onset (range): 63 (45-73)	Predictors of mortality from baseline and cause of death	Onset of falls during the first year and early dysphagia and incontinence were useful predictors of shorter survival (no statistics reported)	Pneumonia (65%), cardiovascular (20%), renal (15%)	Not reported
Lo et al.	2009	N=573 newly diagnosed PD patients from 1994-1995 in Kaiser Permanente of northern California study on epidemiology of PD and followed until 2005 or death	Prospective cohort study using combination of medical record and death certificate data	Mean (SD) age at onset: 70.5 (7.4); age at end of follow-up or death: 74.4 (7.8)	Predictors of mortality (OR and 95% CIs reported)	Baseline predictors of mortality: one unit increase in age at onset (HR (95% CI): 1.11 (1.09, 1.12)), PIGD (HR: 1.84 (1.26, 2.86)), symmetry of motor signs (HR: 2.01 (1.14, 3.66)), mild cognitive impairment vs. absence (HR: 1.66 (1.26, 2.20)), severe cognitive impairment vs. absence (HR: 2.71 (1.88, 3.91)), dysphagia vs. absence (HR: 1.41 (1.08, 1.86)), hallucinations vs. absence (HR: 2.06 (1.31,…	-	Michael J. Fox Foundation; grant R01-31964 from NIH; James and Sharron Clark; and Research Program in Genes, Environment and Health, Kaiser Permanente
Marras et al.	2005	N=800 PD patients recruited for a clinical trial of deprenyl and tocopherol from 1987-1988 and follow-up 13 years later with 296 deaths in US and Canada	Retrospective cohort study using past clinical trial data (DATATOP)	Mean (SD) baseline age: 61 (10) years	Predictors of mortality from baseline (Hazard Ratio and 95% CIs reported)	Baseline predictors of mortality: 10 unit increase in age at onset (HR (95% CI): 2.78 (2.35, 3.28)), male sex vs. female (HR: 1.36 (1.02, 1.81)), cardiac comorbidity vs. none (HR: 1.44 (1.10, 1.91)), total UPDRS, 10 point increase (HR: 1.17 (1.01, 1.36))	-	Canadian Institutes of Health Research; Parkinson Society Canada; National Parkinson Foundation; Mary Trimmer Chair in Geriatric Medicine Research; US Public Health Service grant NS 24778
Manabe et al.	2016	N = 42 patients with DLB confirmed by autopsy and admitted to a Japanese hospital between 2005-2014	Retrospective study using medical record and autopsy data	Median (IQR) age at DLB onset: 78 (72-85); at death: 87 (81-92)	Predictors of mortality (HR and 95% CIs reported) and cause of death (% reported)	Predictors of mortality (HR (95% CI)): male sex (2.84 (1.24, 6.50)), age at onset ≥ 78 (4.71 (1.82, 12.18)), Cerebral infarction (2.36 (1.12, 4.96)), muscle weakness of the lower extremities (2.04 (0.95, 4.39))	Pneumonia (54%), Respiratory failure (13%), heart failure (2.6%), Sepsis (7.7%), Renal failure (15%), Sudden death (10%)	Scientific Research on Innovative Areas from the Ministry of Education, Science, Sports and Culture of Japan
Nath et al.	2005	N=49 deaths with PSP as diagnosis between 1999-2000 in the UK	Cross-sectional study of death certificates	Mortality peaked at ages 75-79	Cause of death (Percentages reported)	-	Causes of death: pneumonia (45%); PSP was mentioned in 65% of death certificates	PSP Europe Association
Nath et al.	2003	N=187 PSP patients in the UK in late 1990's/early 2000's	Prospective cohort study using combination of medical record and death records	Not reported	Early development of clinical factors on risk of PSP-mortality (HR and 95% CIs reported)	Early predictors (vs. absence) of mortality (HR (95% CI)): Falls <1 year post onset (3.28 (1.17, 9.13)), Speech problems < 1 year post onset (4.74 (1.10, 20.4)), swallowing problems < 2 years post onset (3.91 (1.39, 11.0)), PEG insertion < 3 years post onset (9.71 (3.91, 29.6)), Diplopia < 1 year post onset (4.23 (1.23, 14.6)), Early Bulbar problems (2.56 (1.57, 4.15)); late predictors were not s…	-	PSP Europe Association
Oosterveld et al.	2014	N=1786 PD patients with 363 deaths 11 year follow-up (2002-2012) identified from a movement disorder database from Singapore	Prospective cohort study using combination of survey, medical record, and death certificate data	Mean (SD) age at onset: 64.4 (11.2)	Predictors of mortality from baseline (HR and 95% CIs reported)	Baseline predictors of mortality: 1 unit increase in age at onset (HR (95% CI): 1.07 (1.04, 1.09)), male sex vs. female (HR: 2.6 (1.7, 3.9)), MMSE cognitive impairment vs. no cognitive impairment (HR: 2.2 (1.5, 3.3)), UPDRS bradykinesia subscore ≥30 vs. <30 (HR: 1.05 (1.01, 1.09))	-	Singapore National Research Foundation (TCR12dec010)
O'Sullivan et al.	2008	N=110 PSP and N=83 MSA patients identified in the Queen Square Brain Bank for Neurological Disorders in the UK and retrospectively reviewed from 1987-2007	Retrospective cohort study using registry database	Mean (SD) age at onset: 66 (8) for PSP, 57 (10) for PSP	Predictors of disease duration, i.e., time between age at onset and death (HR and 95% CIs reported)	Independent predictors of disease duration (HR (95% CI)) for PSP: RS phenotype (2.37 (1.21, 4.64)), Age of onset for every year increasing (1.05 (1.02, 1.1)), male sex (1.7 (1.03, 2.91)), interval between disease onset and reaching first clinical milestone (0.8 (0.71, 0.9)); for MSA: Not admitted to residential care (2.8 (1.5, 5.5)), early autonomic dysfunction (6.0 (3.1, 11.7)), age at onset (1.…	-	Reta Lila Weston Trust and PSP Europe Association
Pennington et al.	2010	N=143 patients in the care of North Tyneside, UK PD service who died between 1999-2007	Retrospective study using medical record, administrative and national statistics data	Mean age at onset (95% CI): 74.7 (not reported); age at death: 81.4 (68-99)	Cause of death compared to controls (Percentages reported)	-	Causes of death (PD vs. controls): IHD (12% vs 19%); cerebrovascular (9% vs. 10%); malignancy (12% vs. 27%); pneumonia (11% vs. 8%)	Not reported
Pinter et al.	2015	N=237 newly diagnosed PD patients from 1974-1984 and followed until 2012 or death at single academic referral center in Austria	Prospective cohort study using combination of survey, medical record, and death certificate data	Mean age (range) at death: 79.2 (78, 80)	Predictors of mortality from baseline (HR and 95% CIs reported) and causes of death (SMR reported)	Baseline predictors of mortality: 1 unit increase in age at onset (HR (95% CI): 1.08 (1.07, 1.10)), male sex vs. female (HR: 1.6 (1.2, 2.0)), gait disorder (HR: 1.6 (1.1, 2.4))	Causes of death (SMR (95% CI)): cardiovascular (1.58 (1.22, 2.01)); cerebrovascular (1.84 (1.24, 2.65)); malignant neoplasm (0.81 (0.53,1.21)); pneumonia (3.55 (1.42, 7.28))	Austrian Science Fund
Posada et al.	2011	N=81 PD patients diagnosed from 1994-1995 and followed in a longitudinal population-based survey in Spain; 5181 control subjects	Case-control study of survery and medical record data	Baseline mean (SD) age: 77 (6) years in cases; 74 (7) in controls	Predictors of mortality from baseline (HR and 95% CIs reported) and causes of death (percentages reported)	Baseline predictors of mortality: dementia vs. absence of PD and dementia (HR (95% CI): 2.6 (1.4, 4.9)), H&Y stages 3-5 vs. no PD (HR: 2.33 (1.5, 3.6)), H&Y stages 1-2 vs. no PD (HR: 1.5 (1.07, 2.16)), elderly onset (65 and older) vs. no PD ((HR: 1.7 (1.3, 2.4)), earlier onset (<65) vs. no PD ((HR: 1.8 (0.96, 3.38))	Causes of death (PD vs. controls): Parkinsons (18% vs. 0.1%), dementia (4.5% vs 6.8%); cerebrovascular (7.6% vs. 8.5%); cardiovascular (21% vs. 28%); respiratory (14% vs. 14%)	Centro de Investigacion Biomedica en Red sobre Enfermedades Neurodegenerativas, Spain
Tuck et al.	2015	N=1073 deaths with PD listed as cause of death from 2010-2011 in Oregon POLST Registry	Cross-sectional study of mortality statistics	Mean (SD) age at death: 83 (7.6) for PD as primary or secondary cause of death; all other causes: 76 (16)	Cause of death (percentage) and Place of death (PD percentage of death vs. no PD reported)	-	Secondary causes of death (PD primary): dementia (16.2%), other (15.6%), cardiovascular (13%), pulmonary disease (8.9%), endocrine (7.9%), hypertensive (6.9%), mental and behavioral (4.6%), injury (3.8%), pneumonia (3.6%), stroke (3.2%)	Not reported
Vu et al.	2012	N=799 patients from DATATOP in US and Canada	Retrospective study using DATATOP trial cohort data	Baseline median age (95% CI): 63 (40, 77)	Predictors of mortality from baseline (HR and 95% CIs reported)	Baseline predictors of mortality: 1 unit increase in age at study entry (HR (95% CI): 49.1 (8.7, 278)), 10 unit increase in UPDRS score (HR: 1.4 (1.3, 1.6))	-	Amgen
Wenning et al.	2013	N=141 patients with MSA-P and MSA-C recruited between 2003-2004 and followed for 2 years in 15 European MSA centers	Prospective cohort following MSA patients in a registry database in Europe	Mean (SD) age at symptom onset: 56 (8)	Predictors of mortality from baseline (HR and 95% CIs reported); change in UMSARS progression from first visit (OR and 95% CI)	Baseline predictors of mortality (HR (95% CI): parkinsonian variant of MSA (2.08 (1.09, 3.97)), incomplete bladder emptying (2.10 (1.02, 4.30)); shorter symptom duration at baseline (OR 0.68 (0.5, 0.9)) and absent levodopa response (OR 3.4 (1.1, 10.2)) predicted rapid UMSARS progression; 2 year progression rates for UMSARS activities of daily living, motor examination, and total scores were 49% (…	-	Fifth Framework Programme of the European Union; the Oesterreichische Nationalbank; Austrian Science Fund
Wetmore et al.	2019	N=52,103 Meidcare PD beneficiaries with and without incidence psychosis 2007-2015	Retrospective cohort study using Medicare Beneficiary Annual Summary Files	Age groups at study baseline: <70 yrs 13%, 71-75 yrs 16%, 76-80 yrs 22%, 81-85 yrs 25%, 86-90 yrs 17%, >90 yrs 6%.	Nursing home use and death (HR and 95% CI)	PD psychosis had HR 3.38 (CI 2.93-3.90) for custodial care placement, and HR 1.34 (CI 1.23-1.45) for death compared to PD without psychosis		ACADIA Pharmaceuticals
Willis et al.	2012	N=138,000 Medicare beneficiaries with incidence PD identified and followed from 2002-2008	Retrospective cohort study using Medicare Beneficiary Annual Summary Files	Age groups at study baseline: 67-69 (6.9%), 70-74 (16.9%), 75-79 (24.4%), 80-84 (25.4%), 85+ (26.5%)	Predictors of mortality from baseline (HR and 95% CIs reported)	Demented PD cases were more likely to die during six year period vs. PD without dementia (HR (95% CI): 1.72 (1.69, 1.75))	-	National Institute of Neurological Disorders and Stroke at NIH; National Center for Research Resources and National Institutes of Health Roadmap for Medical Research; National Institute for Environmental Health Sciences; St. Louis Chapter of the American Parkinson Disease Association; the American Parkinson Disease Association; Walter and Connie Donius; Robert Renschen Fund
Wu et al.	2016	N=1,213 newly diagnosed PD patients followed from 2001-2008 in Taiwan	Case-control study using a national longitudinal insurance database	Mean age (SD) at diagnosis: 62.9 (17)	Predictors of mortality from pre-motor symptoms (HR and 95% CIs reported)	Baseline predictors of mortality in PD patients: rapid eye movement sleep behavior disorder vs. absence (HR (95% CI): 2.71 (1.10, 6.65)); constipation vs. absence (HR: 1.45 (1.12, 1.87))	-	Taichung Veterans General Hospital (TCVGH-1053402C and TCVGH-1053404D)
Abbreviations: Body Mass Index (BMI); Confidence interval (CI); Dementia with Lewy Bodies (DLB); Frontotemporal Dementia (FTD); Hazard Ratio (HR); Hoehn and Yahr (H&Y); Interquartile range (IQR); Lewy Body Dementia (LBD); Mini Mental Status Exam (MMSE); Multiple System Atrophy (MSA); Multiple System Atrophy-cerebellar variant (MSA-C); Multiple System Atrophy-Parkinsonian variant (MSA-P); Not repo…
